# Supplementary material for: GADD45A and GADD45B as Novel Biomarkers Associated with Chromatin Regulators in Renal Ischemia-Reperfusion Injury
Source: Int J Mol Sci. 2023 Jul 11;24(14):11304. doi: 10.3390/ijms241411304 (PMC10379085; doi:10.3390/ijms241411304)
Supplement: Supplementary file 1 [file ijms-24-11304-s001.zip › Supplemental Spreadsheet 1.xlsx]

## Sheet: 1.ReadMe
Supplemental Spreadsheet 1. CRs(Chromatin Regulators ) related genes list, and intersected genes of black module of WGCNA and DEGs(Differential Expression Genes) in human renal IRI dataset.
This spreadsheet provides CRs(Chromatin Regulators ) related genes list (Tab 2), and intersected genes of black module of WGCNA and DEGs in renal IRI dataset(Tab 3).

## Sheet: 2.CRs related genes
CRs(Chromatin Regulators ) related genes list
ID
A1CF
ACTB
ACTL6A
ACTL6B
ACTR2
ACTR3
ACTR3B
ACTR5
ACTR6
ACTR8
ADNP
AEBP2
AHCTF1
AICDA
AIRE
AKAP1
ALKBH1
ALKBH3
ANP32A
ANP32B
ANP32E
APBB1
APEX1
APOBEC1
APOBEC2
APOBEC3A
APOBEC3B
APOBEC3C
APOBEC3D
APOBEC3F
APOBEC3G
APOBEC3H
ARID1A
ARID1B
ARID2
ARID3A
ARID3B
ARID3C
ARID4A
ARID4B
ARID5A
ARID5B
ARNTL
ARRB1
ASCL1
ASCL2
ASF1A
ASF1B
ASH1L
ASH2L
ASXL1
ASXL2
ASXL3
ATAD2
ATAD2B
ATF2
ATF7IP
ATM
ATN1
ATR
ATRX
ATXN7
ATXN7L3
AURKA
AURKB
AURKC
BABAM1
BAG6
BAHD1
BANF1
BANF2
BANP
BAP1
BARD1
BAZ1A
BAZ1B
BAZ2A
BAZ2B
BBX
BCL10
BCOR
BCORL1
BMI1
BOD1
BPTF
BRCA1
BRCA2
BRCC3
BRD1
BRD2
BRD3
BRD4
BRD7
BRD8
BRD9
BRDT
BRE
BRMS1
BRMS1L
BRPF1
BRPF3
BRWD1
BRWD3
BTAF1
BUB1
C14orf169
C17orf49
CARM1
CBX1
CBX2
CBX3
CBX4
CBX5
CBX6
CBX7
CBX8
CDC6
CDC73
CDK1
CDK17
CDK2
CDK3
CDK5
CDK7
CDK9
CDY1
CDY2A
CDYL
CDYL2
CECR2
CENPC
CHAF1A
CHAF1B
CHD1
CHD1L
CHD2
CHD3
CHD4
CHD5
CHD6
CHD7
CHD8
CHD9
CHEK1
CHMP1A
CHMP1B
CHRAC1
CHTOP
CHUK
CIC
CIR1
CIT
CLNS1A
CLOCK
CRB2
CREBBP
CSNK2A1
CSRP2BP
CTBP1
CTBP2
CTCF
CTCFL
CTR9
CUL1
CUL2
CUL3
CUL4A
CUL4B
CUL5
CXXC1
DAPK3
DAXX
DBF4
DBF4B
DDB1
DDB2
DDX21
DDX50
DEK
DHX30
DIDO1
DMAP1
DNAJC1
DNAJC2
DND1
DNMT1
DNMT3A
DNMT3B
DNMT3L
DNTT
DNTTIP2
DOT1L
DPF1
DPF2
DPF3
DPPA3
DPY30
DR1
DTX3L
DUSP1
DZIP3
E2F6
EED
EHMT1
EHMT2
EID1
EID2
EID2B
ELP2
ELP3
ELP4
ELP5
ELP6
EMSY
ENY2
EP300
EP400
EPC1
EPC2
ERBB4
ERCC6
ERCC6L
ERCC6L2
EXOSC1
EXOSC2
EXOSC3
EXOSC4
EXOSC5
EXOSC6
EXOSC7
EXOSC8
EXOSC9
EYA1
EYA2
EYA3
EYA4
EZH1
EZH2
FAM175A
FAM175B
FBL
FBRS
FBRSL1
FBXL19
FMR1
FOXA1
FOXO1
FOXP1
FOXP2
FOXP3
FOXP4
FTO
FXR1
FXR2
GABRG1
GADD45A
GADD45B
GADD45G
GATAD1
GATAD2A
GATAD2B
GFI1
GFI1B
GLYATL1
GLYR1
GSE1
GSG2
GTF2I
GTF3C1
GTF3C4
HAT1
HBP1
HCFC1
HCFC2
HDAC1
HDAC10
HDAC11
HDAC2
HDAC3
HDAC4
HDAC5
HDAC6
HDAC7
HDAC8
HDAC9
HDGF
HELLS
HIF1AN
HINFP
HIRA
HIRIP3
HJURP
HLCS
HLTF
HMG20A
HMG20B
HMGA1
HMGA2
HMGB1
HMGB2
HMGB3
HMGN1
HMGN2
HMGN3
HMGN4
HMGN5
HN1
HN1L
HNF1A
HNRNPA1
HP1BP3
HR
HSPA1A
HUWE1
IDH1
IDH2
IFIT3
IGFBP7
IKBKAP
IKZF1
IKZF3
ING1
ING2
ING3
ING4
ING5
INO80
INO80B
INO80C
INO80D
INO80E
JADE1
JADE2
JADE3
JAK2
JARID2
JDP2
JMJD1C
JMJD4
JMJD6
JMJD7
JMJD8
KANSL1
KANSL2
KANSL3
KAT2A
KAT2B
KAT5
KAT6A
KAT6B
KAT7
KAT8
KDM1A
KDM1B
KDM2A
KDM2B
KDM3A
KDM3B
KDM4A
KDM4B
KDM4C
KDM4D
KDM4E
KDM5A
KDM5B
KDM5C
KDM5D
KDM6A
KDM6B
KDM7A
KDM8
KEAP1
KMT2A
KMT2B
KMT2C
KMT2D
KMT2E
KMT5A
KMT5B
KMT5C
L3MBTL1
L3MBTL2
L3MBTL3
L3MBTL4
LAS1L
LBR
LEO1
LMNA
LMNB1
LMNB2
LRWD1
MAP3K7
MAPKAPK3
MASTL
MAX
MAZ
MBD1
MBD2
MBD3
MBD4
MBD5
MBD6
MBIP
MBTD1
MCRS1
MDC1
MDM2
MDM4
MEAF6
MECOM
MECP2
MEN1
MGA
MGEA5
MGMT
MIER1
MIER2
MIER3
MINA
MIS18BP1
MLLT1
MLLT10
MLLT3
MLLT6
MOCS1
MORF4
MORF4L1
MORF4L2
MOV10
MPHOSPH8
MRGBP
MSH6
MSL1
MSL2
MSL3
MST1
MTA1
MTA2
MTA3
MTF2
MUM1
MYBBP1A
MYO1C
MYSM1
NAA60
NAP1L1
NAP1L2
NAP1L3
NAP1L4
NAP1L5
NASP
NAT10
NBN
NCL
NCOA1
NCOA2
NCOA3
NCOA4
NCOA5
NCOA6
NCOA7
NCOR1
NCOR2
NEK6
NEK9
NFRKB
NFYB
NFYC
NIPBL
NOC2L
NPAS2
NPM1
NPM2
NSD1
NSL1
OGT
ORC1
ORC2
PADI1
PADI2
PADI3
PADI4
PAF1
PAGR1
PAK2
PARG
PARP1
PARP2
PARP3
PARP4
PATZ1
PAXIP1
PBK
PBRM1
PCGF1
PCGF2
PCGF3
PCGF5
PCGF6
PCNA
PDP1
PDS5A
PDS5B
PELP1
PES1
PHC1
PHC2
PHC3
PHF1
PHF10
PHF12
PHF13
PHF14
PHF19
PHF2
PHF20
PHF20L1
PHF21A
PHF21B
PHF23
PHF3
PHF6
PHF7
PHF8
PHIP
PIWIL4
PKM
PKN1
POGZ
POLE3
PPARGC1A
PPM1G
PPP2CA
PPP4C
PPP4R2
PPP4R3A
PPP4R3B
PPP4R3CP
PRC1
PRDM1
PRDM10
PRDM11
PRDM12
PRDM13
PRDM14
PRDM15
PRDM16
PRDM2
PRDM4
PRDM5
PRDM6
PRDM7
PRDM8
PRDM9
PRKAA1
PRKAA2
PRKAB1
PRKAB2
PRKAG1
PRKAG2
PRKAG3
PRKCA
PRKCB
PRKCD
PRKDC
PRMT1
PRMT2
PRMT3
PRMT5
PRMT6
PRMT7
PRMT8
PRMT9
PRPF31
PRR12
PRR14
PSIP1
PWWP2B
PYGO1
PYGO2
RAC3
RAD51
RAD54B
RAD54L
RAD54L2
RAG1
RAG2
RAI1
RARA
RB1
RBBP4
RBBP5
RBBP7
RBP1
RBX1
RCC1
RCOR1
RCOR2
RCOR3
REST
REV1
RING1
RIT1
RLIM
RMI1
RNF168
RNF17
RNF2
RNF20
RNF40
RNF8
RPS6KA3
RPS6KA4
RPS6KA5
RRP8
RSAD1
RSF1
RTF1
RUVBL1
RUVBL2
RYBP
SAFB
SAP130
SAP18
SAP25
SAP30
SAP30L
SATB1
SATB2
SCMH1
SCML1
SCML2
SCML4
SENP1
SENP3
SET
SETBP1
SETD1A
SETD1B
SETD2
SETD3
SETD4
SETD5
SETD6
SETD7
SETD8P1
SETD9
SETDB1
SETDB2
SETMAR
SF3B1
SF3B3
SFMBT1
SFMBT2
SFPQ
SGF29
SHPRH
SIN3A
SIN3B
SIRT1
SIRT2
SIRT3
SIRT4
SIRT5
SIRT6
SIRT7
SKP1
SLF1
SMARCA1
SMARCA2
SMARCA4
SMARCA5
SMARCAD1
SMARCAL1
SMARCB1
SMARCC1
SMARCC2
SMARCD1
SMARCD2
SMARCD3
SMARCE1
SMC1A
SMCHD1
SMYD1
SMYD2
SMYD3
SMYD4
SMYD5
SNAI2
SND1
SP1
SP100
SP110
SP140
SPEN
SPOP
SRCAP
SRRM2
SRSF1
SRSF3
SS18L1
SS18L2
SSRP1
STK31
STK4
SUDS3
SUPT16H
SUPT3H
SUPT6H
SUPT7L
SUV39H1
SUV39H2
SUZ12
SYNCRIP
TADA1
TADA2A
TADA2B
TADA3
TAF1
TAF10
TAF12
TAF1L
TAF2
TAF3
TAF4
TAF5
TAF5L
TAF6
TAF6L
TAF7
TAF8
TAF9
TAF9B
TBL1XR1
TCF4
TDG
TDRD1
TDRD12
TDRD3
TDRD5
TDRD7
TDRD9
TDRKH
TERF1
TERF2
TET1
TET2
TET3
TEX10
TFDP1
TFF1
TFPT
TLE1
TLE2
TLE4
TLK1
TLK2
TNP1
TNP2
TONSL
TOP2A
TOP2B
TOPBP1
TOX
TOX2
TOX3
TOX4
TP53
TP53BP1
TRDMT1
TRIM16
TRIM24
TRIM27
TRIM28
TRIM33
TRRAP
TSPY1
TSPYL1
TSPYL2
TSPYL4
TSPYL5
TSPYL6
TSSK6
TTF2
TTK
TXN2
TYW5
UBE2A
UBE2B
UBE2D1
UBE2D3
UBE2E1
UBE2H
UBE2N
UBE2T
UBN1
UBR2
UBR5
UBR7
UBTF
UCHL5
UHRF1
UHRF2
UIMC1
UNK
USP11
USP12
USP15
USP16
USP17L2
USP21
USP22
USP3
USP36
USP44
USP46
USP49
USP7
UTY
VDR
VEZF1
VPS72
VRK1
WAC
WDR5
WDR77
WDR82
WHSC1
WHSC1L1
WSB2
XRCC1
YAF2
YEATS2
YEATS4
YWHAB
YWHAE
YWHAZ
YY1
ZBTB16
ZBTB24
ZBTB33
ZBTB38
ZBTB4
ZBTB7C
ZCWPW1
ZCWPW2
ZFAT
ZFP57
ZGPAT
ZHX1
ZHX2
ZHX3
ZMYM1
ZMYM2
ZMYM3
ZMYM4
ZMYM5
ZMYM6
ZMYND11
ZMYND8
ZNF217
ZNF516
ZNF532
ZNF541
ZNF592
ZNF687
ZNF711
ZNHIT1
ZRANB3
ZZZ3

## Sheet: 3.WGCNA co-expression genes
Co-expression genes in the black module of WGCNA analysis (368 genes)				DEGs in renal IRI dataset (163 genes)				Intersection genes of WGCNA black and DEGs in renal IRI dataset (152 genes)
ID				ID				ID
CD69				JUN				GADD45G
SERTAD2				KLF4				CLK1
HIST1H2BD				FOSB				CX3CL1
GADD45G				PPP1R15A				RGS1
RND1				ATF3				MYLIP
ERF				FOS				C8orf4
CLK1				KLF2				DUSP5
PER1				DUSP1				HSPA6
NAMPT				ZFP36				HIST2H2AA3
MKNK2				JUNB				KLF10
CX3CL1				BTG2				BAG3
HSPA1L				KLF6				PPP1R15A
CCDC173				DNAJB1				HSPA1B
ELL2				HSPA1A				ATF3
RGS1				EGR1				CENPJ
MYLIP				HSPA1B				CITED2
C8orf4				SLC2A3				SLC25A25
DUSP5				CSRNP1				ERRFI1
CCL20				JUND				CXCL8
HMGCR				SLC25A25				VASN
TSPYL2				CCNL1				HBA2
HSPA6				ANKRD37				C11orf96
HIST2H2AA3				RHOB				FOS
KLF10				DDIT3				CCL3
BAG3				DUSP5				TOB1
PPP1R15A				SNORD14D				ZC3H12A
HILPDA				NFKBIZ				DNAJA1
HSPA1B				SNORD14C				SLC20A1
ARRDC4				CXCL2				ADAMTS1
ATF3				C10orf10				HSP90AB1
CLCF1				IER2				HSPB1
CENPJ				SERTAD1				MYADM
CCDC59				APOLD1				ZFP36L1
SDC4				GDF15				DDIT3
CITED2				HBEGF				GEM
IFIT3				NR4A2				DUSP6
SLC25A25				MCL1				RIPK4
FBXO33				CYR61				MAFF
DCUN1D3				GADD45B				MYC
ERRFI1				EGR2				CXCL2
TNFRSF10D				CENPJ				IER3
DUSP14				CEBPD				CCNL1
IRF8				DNAJB4				RRAD
CXCL8				MYC				PDK4
VASN				RANBP6				TSC22D2
IFRD1				MXD1				HSPA8
HBA2				NFIL3				HSP90AA1
MLKL				ZNF165				NCOA7
C11orf96				RGS1				PHLDA1
BEGAIN				BHLHE40				SNORD14D
MID1IP1				SOCS3				TSC22D1
FOXQ1				ZC3H12A				CEBPB
ZNF672				TNFAIP3				GADD45A
AP4B1				MIR21				ZFAND2A
FOS				IER5				IL6
FADS1				TRIB1				IER2
IRF2BP2				CDKN1A				TNFAIP3
CCL3				SIK1				CSRNP1
TOB1				CCL3L3				NFIL3
ZC3H12A				GEM				IRF1
DNAJA1				DNAJA1				ADM
SLC20A1				RGS16				BCL3
ADAMTS1				HSPH1				HSPH1
HSP90AB1				RIPK4				SIK1
HSPB1				ELOVL1				GADD45B
ANGPTL4				ITPRIP				NFKBIZ
MYADM				DNAJA4				CCL2
ZFP36L1				IRF1				ZFP36
DDIT3				HSPA6				IER5
GEM				WEE1				CLDN3
YPEL2				C2CD4B				APOLD1
DUSP6				RRAD				KLF6
PTGS2				CCL3				KLF2
CCL4L1				HSP90AA1				SELE
SERPINB1				BAG3				RASD1
PELI1				KLF10				CH25H
CHIC2				CXCL8				EGR2
TCEAL9				PHLDA1				SERPINE1
RIPK4				MAFF				FAM53C
MAFF				RASD1				MIDN
ARL5B				GADD45G				SERPINH1
MYC				NFKBIA				FOSB
EDN2				FAM53C				SNORD14C
HEY2				C11orf96				CKS2
RNF19B				ELF3				ANKRD37
CXCL2				MSX1				MCL1
IER3				CITED2				BRD2
CCNL1				DUSP6				RND3
RRAD				DEDD2				EGR1
PDK4				HSPB1				TIPARP
TSC22D2				MYADM				GLA
THBS1				RNU1-1				C10orf10
HSPA8				SERPINE1				DEDD2
TP53INP2				HSPA8				BHLHE40
INSIG1				BRD2				HIST2H2AC
HSP90AA1				RNVU1-18				ELF3
NCOA7				SERPINH1				BTG2
PHLDA1				NCOA7				NFKBIA
TNFRSF12A				TSC22D1				DNAJB1
SNORD14D				NUAK2				SLC2A3
NOCT				TSC22D2				DNAJA4
PMAIP1				RGS2				MSX1
MSMO1				CEBPB				WEE1
PLEKHO2				CD83				KLF4
SPATA2L				TIPARP				CD83
RNF122				CLK1				RANBP6
BAMBI				CXCL1				SOCS3
PLAUR				IER3				DUSP1
SPRY1				LDLR				TUFT1
NSDHL				SELE				CEBPD
TSC22D1				HSPA7				NR4A2
RAB11FIP1				ZFAND2A				CDKN1A
VMP1				PIM1				CXCL1
KLHL21				HSP90AB1				HSPA1A
CEBPB				GLA				NUAK2
GADD45A				RNU1-3				SERTAD1
HES6				TUFT1				ELOVL1
ZFAND2A				C8orf4				RHOB
TSC22D3				SRF				SRF
LMNA				MYLIP				TRIB1
TINF2				ADAMTS1				ITPRIP
TRIM38				CKS2				SOX9
EPHA2				IL6				JUN
IL6				ZFP36L1				ZNF165
CTGF				SNORD3A				FAM46B
IER2				ADM				RGS16
GBP1				RNVU1-7				JUND
SGK1				SLC20A1				DNAJB4
TNFAIP3				CX3CL1				PIM1
CSRNP1				CH25H				LDLR
MAP1LC3B				RND3				JUNB
KLHL36				PDK4				HBB
AHSA1				SNORD3C				CCL3L3
EFNB2				SNORD3D				HBEGF
RPPH1				ANXA1				ANXA1
NDEL1				VASN				CYR61
NXF1				CLDN3				GDF15
NFIL3				RNU6-1				RGS2
BTG3				MIDN				MXD1
TBPL1				TOB1				HSPA7
IRF1				FAM46B				RNVU1-18
ACAT2				SOX9				SNORD3A
H2AFJ				ERRFI1				HBA1
ADM				GADD45A				SNORD3C
HES1				HIST2H2AA4				SNORD3D
VPS37B				HIST2H2AA3				HIST2H2AA4
BCL3				HIST2H2AC				RNVU1-7
PAPD5				BCL3				RNU1-1
B3GNT2				PDGFRA				RNU1-3
RCAN1				HBA1				C2CD4B
HSPH1				BCL6				RNU6-1
DUSP2				HBA2				MIR21
ITPKC				CCL2
HIST1H2BG				HBB
NFKBIE				MGP
HOXD1				APOD
LIPT1				ADH1A
SIK1				TSPAN8
PLK2				S100A4
MIS12				AKR1B1
LRP5L				DDIT4L
GADD45B				TIMP1
NFKBIZ				CPE
CCL2
ETS2
ZFP36
ARID5B
ID4
IER5
BMP2
CLDN3
APOLD1
CBX4
TICAM1
DHCR24
NEDD9
TNFAIP2
TNF
FILIP1L
HIST2H2BE
HSPA4L
KLF6
ZSWIM4
KLF2
UGCG
ABHD11
CISH
SELE
RN7SK
IFIT2
RASD1
FAM46A
CH25H
FDFT1
MAP3K8
EGR2
DUSP8
FAM107A
SERPINE1
FAM53C
MIDN
CCL3L1
ODC1
CNKSR3
TOB2
SERPINH1
HIST1H4H
FOSB
RHPN2
DNAJB11
SAT1
KRT8
SNORD14C
IDI1
CKS2
ANKRD37
MCL1
HIST1H1C
BRD2
RIPK2
RND3
UBB
EGR1
ELMSAN1
CHMP1B
MAFB
TIPARP
GLA
HSPD1
RRP12
C10orf10
DEDD2
BHLHE40
HIST2H2AC
ELF3
H3F3C
BTG2
SQLE
ATG101
CCL8
CDKN2AIP
NFKBIA
ZNF410
HSPA5
SOCS1
DNAJB1
IL1B
SLC2A3
BTG1
CHORDC1
DNAJA4
MSX1
KLF9
WEE1
SRSF7
KLF4
CD83
RANBP6
SOCS3
DUSP1
TUFT1
FKBP4
CEBPD
NR4A2
YBX3
ACTRT3
KBTBD2
CDKN1A
HELZ2
CITED4
CXCL1
HSPA1A
PIM3
NUAK2
CXCL10
HIST1H2AC
CIART
ID2
SERTAD1
ZFAND5
LINC00936
CRY2
PPRC1
HMGCS1
ELOVL1
SOCS2
FZD5
KLKB1
CD55
FOXJ1
RHOB
SRF
HSPE1
TRIB1
EIF1
FDPS
MRPL18
LSMEM1
ITPRIP
SOX9
JUN
ZNF165
FAM46B
RGS16
FSCN1
SBNO2
JUND
DNAJC27
RELB
ICAM1
DNAJB4
PIM1
DHCR7
RNU11
C1orf132
RNU6ATAC
UBC
OSER1
LDLR
IRS2
JUNB
HBB
CCL3L3
CFAP20
HIST2H4A
HBEGF
ZFP36L2
MEPCE
ANXA1
C3orf52
CYR61
GDF15
RGS2
ARRDC3
MXD1
NR0B2
EFNA1
RNA5S9
HSPA7
IFFO2
RNVU1-18
SNHG1
RNY1
KDM2A
SNORA80A
SNHG9
SNORA31
SNORD3A
HBA1
RNU4ATAC
RNY4
SNORD3C
SNORD3D
RHOU
HIST2H2AA4
RNVU1-7
RNU1-1
HNF1A-AS1
RNU1-3
SNORA67
SNORD104
C2CD4B
RNU4-2
RNU6-1
RNU4-1
VTRNA1-1
MIR221
MIR21
